# Supplementary material
Source: PubMed Central journal article supplement (PMC9880865)

## Supplementary Online Content

Voruganti T, Soulos PR, Mamtani R, Presley CJ, Gross CP. Association between age and survival trends in advanced non–small cell lung cancer after adoption of immunotherapy. *JAMA Oncol*. Published online January 26, 2023.

doi:10.1001/jamaoncol.2022.6901

**eTable 1.** Baseline Characteristics Stratified by Age at Advanced Diagnosis and Year of Advanced Diagnosis

**eTable 2.** Initial Treatment Class by Year of Advanced Diagnosis Among All Treated Patients (% by Year)

**eTable 3.** Unadjusted and Adjusted Association Between Patient Characteristics and Two-Year Survival

**eFigure.** Cohort Formation

This supplementary material has been provided by the authors to give readers additional information about their work.

**eTable 1:** Baseline characteristics stratified by age at advanced diagnosis and year of advanced diagnosis

| Characteristic                         | AGE AT ADVANCED DIAGNOSIS |                            |                            |                          | YEAR OF ADVANCED DIAGNOSIS     |                                |                                |
|----------------------------------------|---------------------------|----------------------------|----------------------------|--------------------------|--------------------------------|--------------------------------|--------------------------------|
|                                        | <55<br>N=4,436<br>N (%)   | 55-64<br>N=12,452<br>N (%) | 65-74<br>N=19,050<br>N (%) | ≥75<br>N=17,781<br>N (%) | 2011-2013<br>N=13,586<br>N (%) | 2014-2016<br>N=19,673<br>N (%) | 2017-2019<br>N=20,460<br>N (%) |
| <b>Characteristic</b>                  |                           |                            |                            |                          |                                |                                |                                |
| <b>Sex</b>                             |                           |                            |                            |                          |                                |                                |                                |
| Female                                 | 2295 (51.7)               | 5827 (46.8)                | 8760 (46.0)                | 8463 (47.6)              | 6418 (47.2)                    | 9311 (47.3)                    | 9616 (47)                      |
| Male                                   | 2141 (48.3)               | 6625 (53.2)                | 10290 (54.0)               | 9318 (52.4)              | 7168 (52.8)                    | 10362 (52.7)                   | 10844 (53)                     |
| <b>Age at advanced NSCLC diagnosis</b> |                           |                            |                            |                          |                                |                                |                                |
| <55                                    |                           |                            |                            |                          | 1333 (9.8)                     | 1651 (8.4)                     | 1452 (7.1)                     |
| 55-64                                  |                           |                            |                            |                          | 3076 (22.6)                    | 4655 (23.7)                    | 4721 (23.1)                    |
| 65-74                                  |                           |                            |                            |                          | 4916 (36.2)                    | 7021 (35.7)                    | 7113 (34.8)                    |
| ≥75                                    |                           |                            |                            |                          | 4261 (31.4)                    | 6346 (32.3)                    | 7174 (35.1)                    |
| <b>Race and Ethnicity</b>              |                           |                            |                            |                          |                                |                                |                                |
| Asian                                  | 145 (3.3)                 | 288 (2.3)                  | 421 (2.2)                  | 431 (2.4)                | 229 (1.7)                      | 474 (2.4)                      | 582 (2.8)                      |
| Black or African American              | 502 (11.3)                | 1370 (11.0)                | 1612 (8.5)                 | 1158 (6.5)               | 1092 (8.0)                     | 1725 (8.8)                     | 1825 (8.9)                     |
| Hispanic or Latino                     | 193 (4.4)                 | 399 (3.2)                  | 594 (3.1)                  | 562 (3.2)                | 386 (2.8)                      | 698 (3.6)                      | 664 (3.3)                      |
| Other                                  | 360 (8.1)                 | 994 (8.0)                  | 1549 (8.1)                 | 1309 (7.4)               | 998 (7.4)                      | 1580 (8.0)                     | 1634 (8.0)                     |
| White                                  | 2831 (63.8)               | 8199 (65.8)                | 12977 (68.1)               | 12309 (69.2)             | 9165 (67.5)                    | 13600 (69.1)                   | 13551 (66.2)                   |
| Missing                                | 405 (9.1)                 | 1202 (9.7)                 | 1897 (10.0)                | 2012 (11.3)              | 1716 (12.6)                    | 1596 (8.1)                     | 2204 (10.8)                    |
| <b>Stage at Initial Diagnosis</b>      |                           |                            |                            |                          |                                |                                |                                |
| Stage I                                | 88 (2.0)                  | 428 (3.4)                  | 983 (5.2)                  | 1262 (7.1)               | 644 (4.7)                      | 997 (5.1)                      | 1120 (5.5)                     |
| Stage II                               | 158 (3.6)                 | 523 (4.2)                  | 1060 (5.6)                 | 1075 (6.1)               | 693 (5.1)                      | 1004 (5.1)                     | 1119 (5.5)                     |
| Stage III                              | 936 (21.1)                | 2702 (21.7)                | 4146 (21.8)                | 3361 (18.9)              | 2861 (21.1)                    | 3964 (20.2)                    | 4320 (21.1)                    |
| Stage IV                               | 3126 (70.5)               | 8248 (66.2)                | 11496 (60.4)               | 10383 (58.4)             | 8398 (61.8)                    | 12346 (62.8)                   | 12509 (61.1)                   |
| Unknown                                | 128 (2.9)                 | 551 (4.4)                  | 1365 (7.2)                 | 1700 (9.6)               | 990 (7.3)                      | 1362 (6.9)                     | 1392 (6.8)                     |
| <b>Smoking status</b>                  |                           |                            |                            |                          |                                |                                |                                |
| No history of smoking                  | 727 (16.4)                | 1281 (10.3)                | 1802 (9.5)                 | 2336 (13.1)              | 1422 (10.5)                    | 2308 (11.7)                    | 2416 (11.8)                    |
| History of smoking                     | 3660 (82.5)               | 11048 (88.7)               | 17050 (89.5)               | 15233 (85.7)             | 11798 (86.8)                   | 17191 (87.4)                   | 18002 (88)                     |
| Unknown                                | 49 (1.1)                  | 123 (1.0)                  | 198 (1.0)                  | 212 (1.2)                | 366 (2.7)                      | 174 (0.9)                      | 42 (0.2)                       |

eTable 1 continued

|                                                                         | AGE AT ADVANCED DIAGNOSIS |                            |                            |                          | YEAR OF ADVANCED DIAGNOSIS     |                                |                                |
|-------------------------------------------------------------------------|---------------------------|----------------------------|----------------------------|--------------------------|--------------------------------|--------------------------------|--------------------------------|
|                                                                         | <55<br>N=4,436<br>N (%)   | 55-64<br>N=12,452<br>N (%) | 65-74<br>N=19,050<br>N (%) | ≥75<br>N=17,781<br>N (%) | 2011-2013<br>N=13,586<br>N (%) | 2014-2016<br>N=19,673<br>N (%) | 2017-2019<br>N=20,460<br>N (%) |
| <b>Location</b>                                                         |                           |                            |                            |                          |                                |                                |                                |
| Northeast                                                               | 699 (15.8)                | 2157 (17.3)                | 3278 (17.2)                | 3502 (19.7)              | 2597 (19.1)                    | 3408 (17.3)                    | 3631 (17.8)                    |
| South                                                                   | 1748 (39.4)               | 4978 (40.0)                | 7823 (41.1)                | 6547 (36.8)              | 5183 (38.2)                    | 7458 (37.9)                    | 8455 (41.3)                    |
| Midwest                                                                 | 806 (18.2)                | 2007 (16.1)                | 2682 (14.1)                | 2498 (14.1)              | 1909 (14.1)                    | 2984 (15.2)                    | 3100 (15.2)                    |
| West                                                                    | 541 (12.2)                | 1674 (13.4)                | 2829 (14.9)                | 2996 (16.9)              | 2103 (15.5)                    | 2997 (15.2)                    | 2940 (14.4)                    |
| Missing                                                                 | 642 (14.5)                | 1636 (13.1)                | 2438 (12.8)                | 2238 (12.6)              | 1794 (13.2)                    | 2826 (14.4)                    | 2334 (11.4)                    |
| <b>Insurance</b>                                                        |                           |                            |                            |                          |                                |                                |                                |
| Medicare                                                                | 233 (5.3)                 | 1120 (9.0)                 | 19050 (100.0)              | 17781 (100.0)            | 9481 (69.8)                    | 13895 (70.6)                   | 14808 (72.4)                   |
| Commercial                                                              | 1447 (32.6)               | 4529 (36.4)                | 0 (0)                      | 0 (0)                    | 1202 (8.9)                     | 2240 (11.4)                    | 2534 (12.4)                    |
| Other including Medicaid                                                | 886 (20.0)                | 2199 (17.7)                | 0 (0)                      | 0 (0)                    | 700 (5.2)                      | 1110 (5.6)                     | 1275 (6.2)                     |
| Uninsured/unknown                                                       | 1870 (42.2)               | 4604 (37.0)                | 0 (0)                      | 0 (0)                    | 2203 (16.2)                    | 2428 (12.3)                    | 1843 (9.0)                     |
| <b>Histological type</b>                                                |                           |                            |                            |                          |                                |                                |                                |
| Squamous cell carcinoma                                                 | 755 (17.0)                | 2842 (22.8)                | 5338 (28.0)                | 5003 (28.1)              | 3505 (25.8)                    | 4982 (25.3)                    | 5451 (26.6)                    |
| Non-squamous cell carcinoma (i.e. adenocarcinoma, large cell carcinoma) | 3383 (76.3)               | 8949 (71.9)                | 12713 (66.7)               | 11836 (66.6)             | 9181 (67.6)                    | 13641 (69.3)                   | 14059 (68.7)                   |
| Not otherwise specified                                                 | 298 (6.7)                 | 661 (5.3)                  | 999 (5.2)                  | 942 (5.3)                | 900 (6.6)                      | 1050 (5.3)                     | 950 (4.6)                      |
| <b>First-line treatment regimen</b>                                     |                           |                            |                            |                          |                                |                                |                                |
| No treatment                                                            | 909 (20.5)                | 2794 (22.4)                | 4807 (25.2)                | 5937 (33.4)              | 4217 (31.0)                    | 5385 (27.4)                    | 4845 (23.7)                    |
| Immune checkpoint inhibitor alone <sup>1</sup>                          | 264 (6.0)                 | 871 (7.0)                  | 1470 (7.7)                 | 1844 (10.4)              | 45 (0.3)                       | 1034 (5.3)                     | 3370 (16.5)                    |
| Immune checkpoint inhibitor with chemotherapy <sup>2</sup>              | 359 (8.1)                 | 1144 (9.2)                 | 1585 (8.3)                 | 1170 (6.6)               | 6 (0.0)                        | 39 (0.2)                       | 4213 (20.6)                    |
| Tyrosine kinase inhibitor <sup>3</sup>                                  | 510 (11.5)                | 964 (7.7)                  | 1339 (7.0)                 | 1677 (9.4)               | 1197 (8.8)                     | 1638 (8.3)                     | 1655 (8.1)                     |
| Other treatment                                                         | 2394 (54.0)               | 6679 (53.6)                | 9849 (51.7)                | 7153 (40.2)              | 8121 (59.8)                    | 11577 (58.9)                   | 6377 (31.2)                    |

<sup>1</sup>Immune checkpoint inhibitors included Pembrolizumab, Nivolumab, Atezolizumab, Durvalumab, Ipilimumab, Cemiplimab

<sup>2</sup>Also includes a small number of patients who received immune checkpoint inhibitors with tyrosine kinase inhibitors

<sup>3</sup> Tyrosine kinase inhibitors included Osimertinib, Erlotinib, Afatinib, Gefitinib, Dacomitinib, Mobocertinib, Lazertinib, Icotinib, Sotarasib, Adagrasib, Alectinib, Brigatinib, Lorlatinib, Ceritinib, Crizotinib, Entrectinib, Crizotinib, Ceritinib, Lorlatinib, Dabrafenib, Trametinib, Vemurafenib, Encorafenib, Tepotinib, Capmatinib, Pralsetinib, Selpercatinib, Entrectinib, Larotrectinib

**eTable 2:** Initial treatment class by year of advanced diagnosis among all treated patients (% by year)

|                                     | <b>2011</b> | <b>2012</b> | <b>2013</b> | <b>2014</b> | <b>2015</b> | <b>2016</b> | <b>2017</b> | <b>2018</b> | <b>2019</b> |
|-------------------------------------|-------------|-------------|-------------|-------------|-------------|-------------|-------------|-------------|-------------|
| <b>Immune Checkpoint Inhibitors</b> | 0.3         | 0.2         | 0.6         | 1.1         | 4.7         | 10.3        | 27.3        | 38.8        | 45.6        |
| <b>Tyrosine Kinase Inhibitors</b>   | 8.6         | 9.5         | 8.4         | 8.9         | 7.9         | 8.3         | 7.9         | 7.6         | 8.9         |
| <b>Any other treatment</b>          | 60.2        | 60.1        | 59.2        | 60.2        | 60.2        | 56.3        | 40.9        | 29.3        | 22.8        |
| <b>No treatment</b>                 | 31.0        | 30.1        | 31.8        | 29.9        | 27.3        | 25.2        | 24.0        | 24.3        | 22.8        |

**eTable 3:** Unadjusted and adjusted association between patient characteristics and two-year survival

| Characteristic                         | UNADJUSTED |                         |      | ADJUSTED   |                         |      |
|----------------------------------------|------------|-------------------------|------|------------|-------------------------|------|
|                                        | Odds Ratio | 95% Confidence Interval |      | Odds Ratio | 95% Confidence Interval |      |
| <b>Sex</b>                             |            |                         |      |            |                         |      |
| Female                                 |            | Reference               |      |            | Reference               |      |
| Male                                   | 0.71       | 0.68                    | 0.73 | 0.76       | 0.73                    | 0.79 |
| <b>Age at advanced NSCLC diagnosis</b> |            |                         |      |            |                         |      |
| <55                                    |            | Reference               |      |            | Reference               |      |
| 55-64                                  | 0.91       | 0.84                    | 0.98 | 0.94       | 0.86                    | 1.01 |
| 65-74                                  | 0.83       | 0.77                    | 0.89 | 1.05       | 0.90                    | 1.21 |
| ≥75                                    | 0.67       | 0.62                    | 0.72 | 0.80       | 0.69                    | 0.93 |
| <b>Year of diagnosis</b>               |            |                         |      |            |                         |      |
| 2011-2013                              |            | Reference               |      |            | Reference               |      |
| 2014-2016                              | 1.12       | 1.07                    | 1.18 | 1.10       | 1.05                    | 1.16 |
| 2017-2019                              | 1.35       | 1.29                    | 1.43 | 1.34       | 1.27                    | 1.42 |
| <b>Race and Ethnicity</b>              |            |                         |      |            |                         |      |
| Asian                                  | 1.79       | 1.57                    | 2.05 | 1.53       | 1.33                    | 1.76 |
| Black or African American              | 1.18       | 1.10                    | 1.27 | 1.16       | 1.08                    | 1.25 |
| Hispanic or Latino                     | 1.32       | 1.17                    | 1.48 | 1.27       | 1.13                    | 1.43 |
| Other                                  | 1.01       | 0.93                    | 1.11 | 0.99       | 0.91                    | 1.08 |
| White                                  |            | Reference               |      |            | Reference               |      |
| Missing                                | 0.75       | 0.70                    | 0.81 | 0.78       | 0.72                    | 0.84 |
| <b>Stage at Initial Diagnosis</b>      |            |                         |      |            |                         |      |
| Stage I                                |            | Reference               |      |            | Reference               |      |
| Stage II                               | 0.91       | 0.81                    | 1.02 | 0.91       | 0.81                    | 1.03 |
| Stage III                              | 0.81       | 0.73                    | 0.88 | 0.81       | 0.74                    | 0.89 |
| Stage IV                               | 0.50       | 0.46                    | 0.54 | 0.46       | 0.42                    | 0.50 |
| Unknown                                | 0.84       | 0.75                    | 0.93 | 0.87       | 0.78                    | 0.97 |
| <b>Smoking status</b>                  |            |                         |      |            |                         |      |
| No history of smoking                  |            | Reference               |      |            | Reference               |      |
| History of smoking                     | 0.60       | 0.57                    | 0.64 | 0.64       | 0.60                    | 0.68 |
| Unknown                                | 0.24       | 0.19                    | 0.31 | 0.30       | 0.24                    | 0.37 |
| <b>Location</b>                        |            |                         |      |            |                         |      |
| Northeast                              |            | Reference               |      |            | Reference               |      |
| South                                  | 1.13       | 0.92                    | 1.38 | 1.13       | 0.93                    | 1.38 |
| Midwest                                | 1.71       | 1.34                    | 2.19 | 1.61       | 1.26                    | 2.05 |
| West                                   | 1.09       | 0.84                    | 1.42 | 1.17       | 0.91                    | 1.50 |

|         |      |      |      |      |      |      |
|---------|------|------|------|------|------|------|
| Missing | 0.66 | 0.53 | 0.82 | 0.75 | 0.60 | 0.93 |
|---------|------|------|------|------|------|------|

**eTable 3 continued**

| Characteristic              | UNADJUSTED |                         |      | ADJUSTED   |                         |      |
|-----------------------------|------------|-------------------------|------|------------|-------------------------|------|
|                             | Odds Ratio | 95% Confidence Interval |      | Odds Ratio | 95% Confidence Interval |      |
| <b>Insurance</b>            |            |                         |      |            |                         |      |
| Medicare                    |            | Reference               |      |            | Reference               |      |
| Commercial                  | 1.19       | 1.11                    | 1.26 | 1.15       | 1.00                    | 1.32 |
| Other including Medicaid    | 1.22       | 1.12                    | 1.32 | 1.21       | 1.04                    | 1.40 |
| Uninsured/unknown           | 1.35       | 1.27                    | 1.43 | 1.43       | 1.25                    | 1.65 |
| <b>Histological type</b>    |            |                         |      |            |                         |      |
| Squamous cell carcinoma     |            | Reference               |      |            | Reference               |      |
| Non-squamous cell carcinoma | 1.31       | 1.25                    | 1.37 | 1.31       | 1.25                    | 1.37 |
| Not otherwise specified     | 0.80       | 0.72                    | 0.88 | 0.85       | 0.77                    | 0.94 |

**eFigure: Cohort Formation**

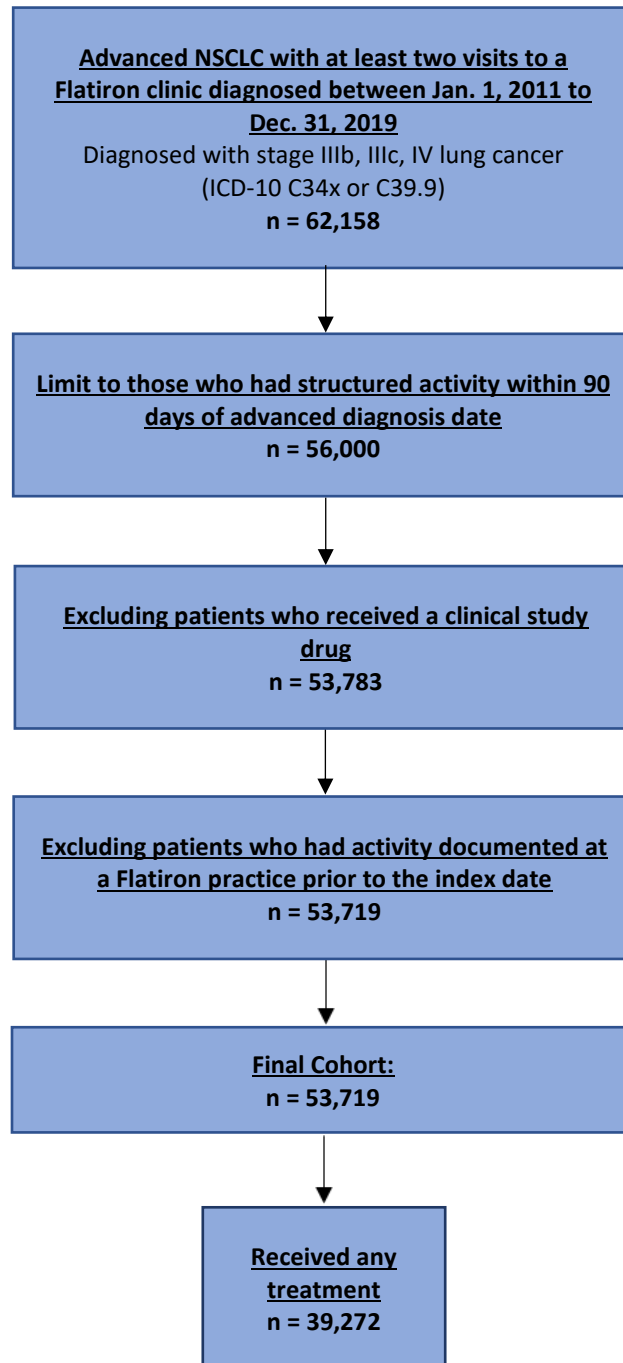

Supplement: jamaoncol-e226901-s001.pdf [file jamaoncol-e226901-s001.pdf]
