# Supplementary material
Source: PubMed Central journal article supplement (PMC9880865)
Supplement: jamaoncol-e226901-s002.pdf [file jamaoncol-e226901-s002.pdf]

## Data Sharing Statement

Voruganti. Association Between Age and Survival Trends in Advanced Non-Small Cell Lung Cancer After Adoption of Immunotherapy. *JAMA Oncol*. Published January 26, 2023.  
doi:10.1001/jamaoncol.2022.6901

### Data

**Data available:** No

### Additional Information

**Explanation for why data not available:** The data that support the findings of this study have been originated by Flatiron Health, Inc. These de-identified data may be made available upon request, and are subject to a license agreement with Flatiron Health; interested researchers should contact <[DataAccess@flatiron.com](mailto:DataAccess@flatiron.com)> to determine licensing terms.
